# Supplementary material
Source: Research Square preprint supplement (doi:10.21203/rs.3.rs-10255862/v1)
Supplement: Supplementary file 1 [file 06af1c880cea67febc142672.docx]

**Table S1. Cysteine 552 Is Conserved in FGFR4 but Absent in FGFR1–3 Across Human and Pig.**

| **Species** | **Protein** | **Accession No.** | **Sequence (around 552)** | |
| --- | --- | --- | --- | --- |
| Human | FGFR1 | NP_001341297.1 | | 541 dnvmkiadfg l**a**rdihhidy |
| FGFR2 | NP_075418.1 | | 541 rnvlvtennv m**k**iadfglar |
| FGFR3 | NP_001156685.1 | | 541 inllgactqg g**p**lyvlveya |
| FGFR4 | NP_998812.1 | | 541 tqegplyviv e**c**aakgnlre |
| Pig | FGFR1 | XP_005671824.2 | | 541 niinllgact q**d**gplyvive |
| FGFR2 | NP_001093394.1 | | 541 migkhkniin l**l**gactqdgp |
| FGFR3 | XP_020956561.1 | | 541 gactqggply v**l**veyaakgn |
| FGFR4 | XP_013843009.1 | | 541 tqegplyviv e**c**aakgnlre |

*The amino acid at position 552 is highlighted in **bold red**. c: Cysteine

**Table S2. Antibodies used in this study.**

| **Type** | **Target** | **Host** | **Clonality** | | **Catalog No.** | **Dilution** |
| --- | --- | --- | --- | --- | --- | --- |
| Primary antibody | Phospho-FGFR4 (Tyr642) | Rabbit | Polyclonal | AF7262 | | 1:200 |
| Phospho-FRS2 (Tyr196) | Rabbit | Polyclonal | PA5-105926 | | 1:200 |
| Phospho-p44/42 MAPK/ERK1/2 (Thr202/Tyr204) | Rabbit | Polyclonal | #9101 | | 1:200 |
| Phospho-Akt (Ser473) | Rabbit | Monoclonal | #4060 | | 1:200 |
| Phospho-STAT3 (Tyr705) | Mouse | Monoclonal | #4113 | | 1:200 |
| Secondary antibody | Goat anti-Mouse IgG (H+L) Secondary Antibody, Alexa Fluor™ 488 | Goat | Polyclonal | A-11029 | | 1:400 |
| Goat anti-Rabbit IgG (H+L) Secondary Antibody, Alexa Fluor™ 594 | Goat | Polyclonal | A-11012 | | 1:400 |

# Table S3. Primer sequences used for qPCR.

| **mRNA** | **Primer sequences** | **Product size (bp)** | **GenBank accession number** |
| --- | --- | --- | --- |
| *GAPDH* | F: 5’-GTCGGTTGTGGATCTGACCT-3’ | 374 | NC_010447.5 |
| R: 5’-TTGACGAAGTGGTCGTTGAG-3’ |
| *SUPT4H1* | F: 5’- GTGTTCGCTGGTCAAGACTA-3’ | 187 | XM_003131646.4 |
| R: 5’- AAAGTTACTGACTCGCTGCC-3’ |
| *MYC* | F: 5’- CACACAATGTCTTGGAACGC-3’ | 222 | NM_001005154.1 |
| R: 5’- GCACGTCTTTTTCTGACACG-3’ |
| *EIF1AX* | F: 5’- AAATGCTGGGAAATGGACGA-3’ | 204 | NM_001243218.1 |
| R: 5’- CGCCATATGCCTTCAGACTT-3’ |
| *KLF4* | F: 5’- CGGCAAAACCTACACGAAGA-3’ | 203 | NM_001031782.2 |
| R: 5’- GGTGGTCCGACCTTGAAAAT-3’ |
| *LEUTX* | F: 5’- ATGCTTCTGACCCTGACTCT-3’ | 217 | XM_013988567.2 |
| R: 5’- TCCTCGCCAGGTAAGTTGTA-3’ |

*F: Forward, R: Reverse

**Table S4.** **Effect of BLU9931 supplementation during IVM.**

| BLU9931 concentration (μM) | Total oocyte, N* | Degenerated oocyte (%) | | Immature oocytes (%) | Mature oocytes (%) |
| --- | --- | --- | --- | --- | --- |
| 0 | 185 | 26 (14.4 ± 3.7)a | 37 (19.7 ± 3.5) | | 122 (66.0 ± 0.5)a |
| 2 | 173 | 24 (13.9 ± 1.9)a | 71 (41.3 ± 5.0) | | 78 (44.8 ± 4.2)b |
| 4 | 180 | 89 (49.4 ± 4.8)b | 83 (46.1 ± 2.9) | | 8 (4.4 ± 2.2)c |
| 8 | 179 | 162 (90.5 ± 2.9)c | 17 (9.5 ± 2.9) | | 0 (0.0 ± 0.0)c |

N*: Three times replicated. a-cValues with different superscripts within a column differ significantly (*p* < 0.05).
